# Supplementary material for: Circulating Tumor DNA Enables Sensitive Detection of Actionable Gene Fusions and Rearrangements Across Cancer Types
Source: PubMed Central journal article supplement — Clin Cancer Res. 2023 Dec 7;30(4):836–48. doi: 10.1158/1078-0432.CCR-23-2693 (PMC10870120; doi:10.1158/1078-0432.ccr-23-2693), 2023-12-07
Supplement: ccr-23-2693_supplementary_data_1_suppds1.pdf [file ccr-23-2693_supplementary_data_1_suppds1.pdf]

# Supplementary Figure 1

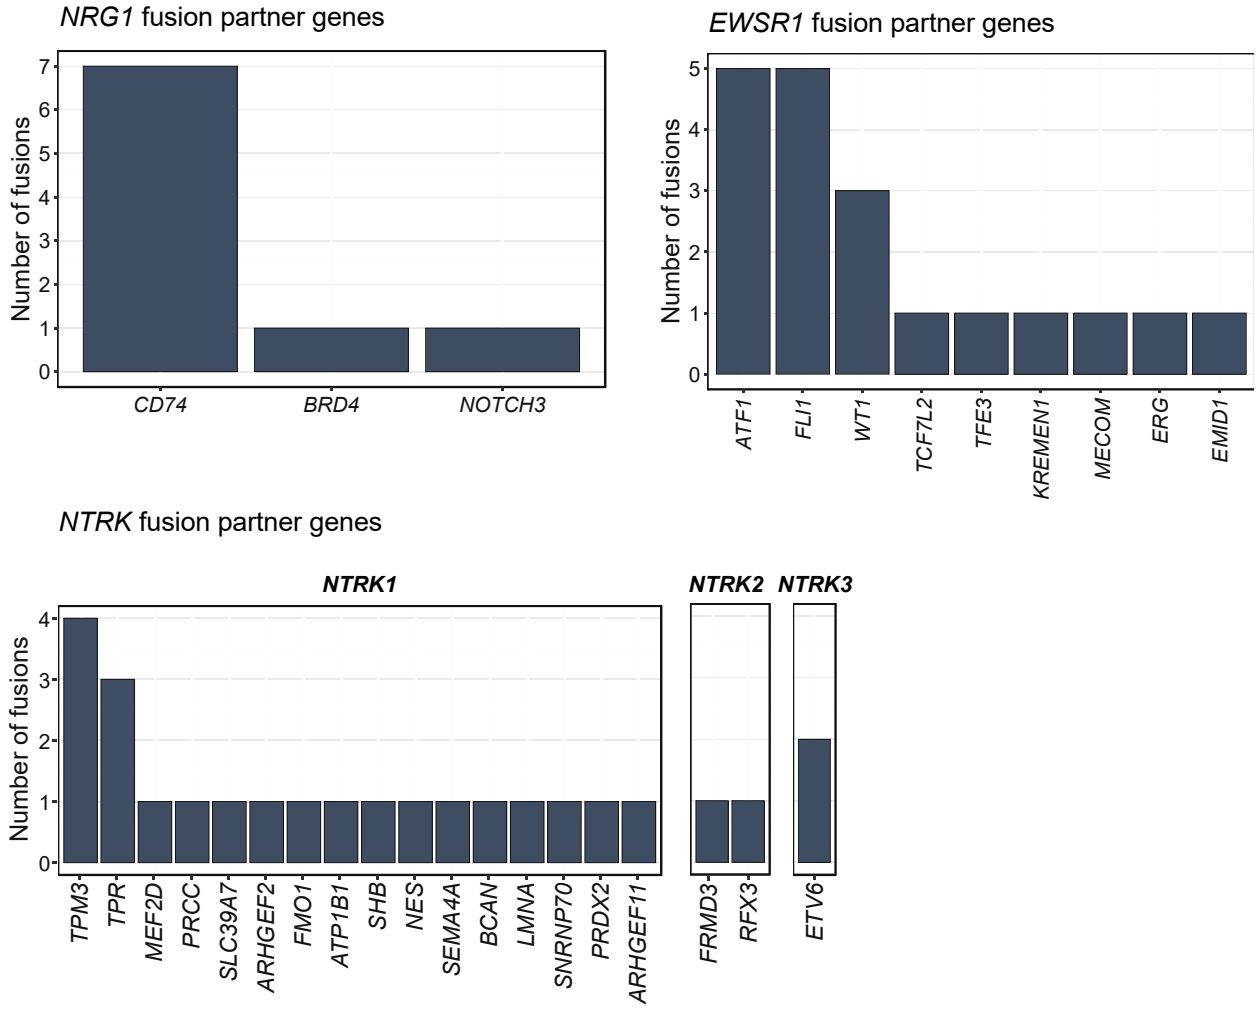

## Supplementary Figure 1. Rare gain-of-function fusions

Gene partners for *NRG1*, *EWSR1*, and *NTRK* fusions detected in liquid biopsies.

## Supplementary Figure 2

|                       |                             |
|-----------------------|-----------------------------|
| Concordant detection  | Liquid-only detection       |
| Tissue-only detection | Detection in neither biopsy |
| PPA (95% CI)          |                             |

| NSCLC ALK                   | TF < 1%        |         | TF ≥ 1%         |         |
|-----------------------------|----------------|---------|-----------------|---------|
|                             | Tissue+        | Tissue- | Tissue+         | Tissue- |
| Liquid+                     | 22             | 2       | 20              | 2       |
| Liquid-                     | 19             | 964     | 1               | 848     |
|                             | 54% (38 - 69%) |         | 95% (74 - 100%) |         |
|                             | 68% (55 - 79%) |         |                 |         |
| NSCLC RET                   | TF < 1%        |         | TF ≥ 1%         |         |
|                             | Tissue+        | Tissue- | Tissue+         | Tissue- |
| Liquid+                     | 4              | 1       | 6               | 3       |
| Liquid-                     | 12             | 990     | 1               | 861     |
|                             | 25% (8 - 53%)  |         | 86% (42 - 99%)  |         |
| NSCLC ROS1                  | TF < 1%        |         | TF ≥ 1%         |         |
|                             | Tissue+        | Tissue- | Tissue+         | Tissue- |
| Liquid+                     | 3              | 0       | 4               | 0       |
| Liquid-                     | 11             | 993     | 1               | 866     |
|                             | 21% (6 - 51%)  |         | 80% (30 - 99%)  |         |
| Prostate cancer TMPRSS2-ERG | TF < 1%        |         | TF ≥ 1%         |         |
|                             | Tissue+        | Tissue- | Tissue+         | Tissue- |
| Liquid+                     | 6              | 1       | 46              | 2       |
| Liquid-                     | 37             | 148     | 7               | 232     |
|                             | 14% (6 - 29%)  |         | 87% (74 - 94%)  |         |
| Prostate cancer BRAF        | TF < 1%        |         | TF ≥ 1%         |         |
|                             | Tissue+        | Tissue- | Tissue+         | Tissue- |
| Liquid+                     | 0              | 0       | 3               | 0       |
| Liquid-                     | 1              | 191     | 1               | 283     |
|                             | 0% (0 - 95%)   |         | 75% (22 - 99%)  |         |

### Supplementary Figure 2. Sensitivity of detection of driver rearrangements in paired tissue and liquid biopsy from the same patient.

For tissue and LBx pairs where LBx was collected up to 90 days earlier and up to 2 years later than tissue, the sensitivity of detection was compared at different tumor fraction thresholds. Sensitivity is calculated as positive percent agreement (PPA), with continuity corrected Wilson 95% confidence intervals.

### Supplementary Figure 3

| ALK/RET/ROS1<br>PPA | TF ≥ 0%<br>(N=1878) | TF ≥ 0.5%<br>(N=1006) | TF ≥ 1%<br>(N=871)  | TF ≥ 2%<br>(N=732)  | TF ≥ 4%<br>(N=560)  |
|---------------------|---------------------|-----------------------|---------------------|---------------------|---------------------|
|                     | 0.57<br>(0.47-0.66) | 0.92<br>(0.79-0.97)   | 0.91<br>(0.76-0.97) | 0.88<br>(0.69-0.96) | 0.90<br>(0.71-0.97) |

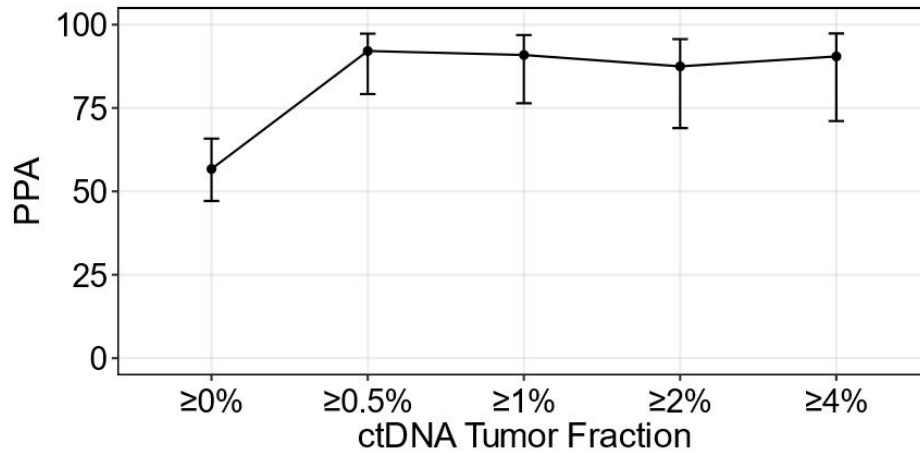

**Supplementary Figure 3. Sensitivity of detection of driver fusions (ALK, RET, and ROS1) in paired tissue and liquid biopsy at different tumor fraction thresholds.**

For tissue and LBx pairs where LBx was collected up to 90 days earlier and up to 2 years later than tissue, the sensitivity of detection was compared at different tumor fraction thresholds. Sensitivity is calculated as positive percent agreement (PPA), with continuity corrected Wilson 95% confidence intervals.
